1 **Germline *ERBB3* mutation in familial non-small cell lung carcinoma: expanding**  
2 **ErbB's role in oncogenesis.**

3

4 **Authors:** Aideen M. McInerney-Leo, PhD,<sup>1</sup> Hui Yi Chew, BSc,<sup>1</sup> Po-Ling Inglis, MBBS  
5 FRACP,<sup>2</sup> Paul J. Leo, BSc,<sup>3</sup> Shannon R. Joseph, PhD,<sup>1</sup> Caroline L. Cooper, MBBS FRCPA,<sup>4</sup>  
6 <sup>5</sup> Satomi Okano, MBiostatistics,<sup>1</sup> Tim Hassall, MBBS FRACP,<sup>6</sup> Lisa Anderson, BSc,<sup>2</sup>  
7 Rayleen V. Bowman, MBBS FRACP PhD,<sup>5,7</sup> Michael Gattas, MBBS FRACP,<sup>8</sup> Jessica E.  
8 Harris, MSc,<sup>3</sup> Mhairi S. Marshall, MSc,<sup>3</sup> Janet G. Shaw, BSc,<sup>5,7</sup> Lawrie Wheeler, BSc,<sup>3</sup> Ian  
9 A. Yang, MBBS FRACP PhD,<sup>5,7</sup> Matthew A. Brown, MBBS MD FRACP,<sup>3,9,10</sup> Kwun M.  
10 Fong, MBBS FRACP PhD,<sup>5,7\*</sup> Fiona Simpson, PhD,<sup>1\*</sup> Emma L. Duncan, MBBS MRCP  
11 FRACP PhD,<sup>3,5,11\*</sup>.

12

13 \*Joint senior authors

14 <sup>1</sup>The Dermatology Research Centre, The University of Queensland Diamantina Institute, The  
15 University of Queensland, Woolloongabba, QLD, 4102.

16 <sup>2</sup>Medical Oncology, Royal Brisbane and Women's Hospital, Herston, QLD, 4029.

17 <sup>3</sup>Australian Translational Genomics Centre, Institute of Health and Biomedical Innovation,  
18 School of Biomedical Sciences, Queensland University of Technology (QUT), Translational  
19 Research Institute, 37 Kent St, Woolloongabba, QLD, 4102.

20 <sup>4</sup>Department of Anatomical Pathology, Pathology Queensland, Princess Alexandra Hospital,  
21 Brisbane

22 <sup>5</sup>UQTRC, Faculty of Medicine, The University of Queensland, 288 Herston Road, Herston,  
23 QLD, 4006.

24 <sup>6</sup>Queensland Children's Hospital, South Brisbane, QLD, 4101.

25 <sup>7</sup>Department of Thoracic Medicine, The Prince Charles Hospital, Rode Road,  
26 Chermside, QLD, 4032.

27 <sup>8</sup>Genetic Health Queensland, Royal Brisbane and Women's Hospital, Herston, QLD, 4029.

28 <sup>9</sup> Guy's and St Thomas' NHS Foundation Trust, London, United Kingdom

29 <sup>10</sup> King's College London NIHR Biomedical Research Centre, King's College London,  
30 United Kingdom

31 <sup>11</sup>Department of Endocrinology, Royal Brisbane and Women's Hospital, Butterfield St,  
32 Herston, QLD, 4029.

33

34 **Running title:** Germline *ERBB3* mutation in autosomal dominant NSCLC

35

36 **Keywords:** *ERBB3*, germline mutation, autosomal dominant, lung cancer, signalling pathway  
37 activation.

38

39 **Corresponding author:**

40 Professor Emma L. Duncan

41 Department of Twin Research & Genetic Epidemiology, School of Life Course Sciences

42 Faculty of Life Sciences and Medicine

43 King's College London

44 Mailing Address:

45 Department of Twin Research & Genetic Epidemiology

46 St Thomas' Campus

47 Lambeth Palace Road

48 London SE1 7EH

49 United Kingdom

50 Email: emma.duncan@kcl.ac.uk

51

52 **Disclaimers:** The authors declare no competing financial interests.

53 **Word Count: 2426 (excluding abstract, reference list, tables, and figure legends)**

54 **Number of Figures and Tables:** Three figures and one table.

55

56

57 **Abbreviations:** CNV, copy number variation; EGFR, Epidermal Growth Factor Receptor;

58 GWAS, genome-wide association studies; MAF, minor allele frequency; NSCLC, non-small-

59 cell lung cancer; TKIs, tyrosine kinase inhibitors.

60

61 **ABSTRACT**

62 *Background*

63 Lung cancer is the commonest cause of cancer deaths worldwide. Although strongly  
64 associated with smoking, predisposition to lung cancer is also heritable with multiple  
65 common risk variants identified. Rarely, dominantly inherited non-small-cell lung cancer  
66 (NSCLC) has been reported due to somatic mutations in *EGFR/ErbB1* and *ERBB2*.

67 *Methods*

68 Germline exome sequencing was performed in a multi-generation family with autosomal  
69 dominant NSCLC, including an affected child. Tumour samples were also sequenced. Full-  
70 length wild-type (wtErbB3) and mutant ERBB3 (mutErbB3) constructs were transfected into  
71 HeLa cells. Protein expression, stability, and sub-cellular localisation were assessed; and  
72 cellular proliferation, pAkt/Akt, and pERK levels were determined.

73 *Results*

74 A novel germline variant in *ERBB3* (c.1946T>G: p.Iso649Arg), coding for receptor tyrosine-  
75 protein kinase erbB-3 (ErbB3), was identified, with appropriate segregation. There was no  
76 loss-of-heterozygosity in tumour samples. Both wtErbB3 and mutErbB3 were stably  
77 expressed. MutErbB3-transfected cells demonstrated an increased ratio of the 80kD form  
78 (which enhances proliferation) compared to the full-length (180kD) form. MutErbB3 and  
79 wtErbB3 had similar punctate cytoplasmic localisation pre- and post-EGF stimulation;  
80 however, EGFR levels decreased faster post-stimulation in mutErbB3-transfected cells,  
81 suggesting more rapid processing of the mutErbB3/EGFR heterodimer. Cellular proliferation  
82 was increased in mutErbB3-transfected cells compared to wtErbB3 transfection. MutErbB3-  
83 transfected cells also showed decreased pAkt/tAkt ratios and increased pERK/tERK 30  
84 minutes post-stimulation compared to wtErbB3 transfection, demonstrating altered signalling

85 pathway activation by mutErbB3. Cumulatively, these results support this mutation as  
86 tumorigenic.

87 *Conclusions*

88 This is the first reported family with a germline *ERBB3* mutation causing heritable NSCLC,  
89 furthering understanding of the ErbB family pathway in oncogenesis.

90

## 91 INTRODUCTION

92 Lung cancer is the leading cause of cancer deaths worldwide (World Health Organisation)  
93 [1], with over 80% of cases attributable to smoking. However, lung cancer is also heritable,  
94 with heritability of ~18% [2]. Genome-wide association studies (GWAS) have identified  
95 multiple susceptibility loci for lung cancer overall (reviewed [3, 4]), for non-small cell lung  
96 cancer (NSCLC) [5] and for histology-specific sub-types of NSCLC [6] (with specific  
97 GWAS in squamous cell carcinoma [7] and adenocarcinoma [8], but not large cell to date).  
98 There have also been many reports of familial aggregation of lung cancer, (summarised [9]),  
99 with increased familial risk particularly observed in cases with younger age of onset [10, 11],  
100 of female gender, and with adenocarcinoma [12], even after adjusting for smoking status [12,  
101 13]. Linkage and association studies in familial lung cancer have identified unique  
102 susceptibility loci, as well as confirming loci associated with NSCLC overall and with  
103 specific NSCLC subtypes [14-18]. Additionally, GWAS have identified unique susceptibility  
104 loci for NSCLC cases carrying somatic EGFR mutations [19, 20].

105

106 Somatic gain-of-function mutations affecting the tyrosine kinase (TK) domain of  
107 Epidermal Growth Factor Receptor (EGFR) are common in non-small cell lung cancer  
108 (NSCLC), particularly adenocarcinoma, and predict responsiveness to EGFR-targeting  
109 tyrosine kinase inhibitors (TKIs) [21]. Extremely rarely, germline carriage of *EGFR*  
110 mutations has been described in families with autosomal dominant NSCLC, occasionally  
111 with additional somatic *EGFR* mutations [22, 23]. EGFR (ErbB1, Human EGF Receptor  
112 [HER] 1) belongs to the ErbB family of receptor tyrosine kinases which includes ErbB2 (neu,  
113 HER2), ErbB3 (HER3) and ErbB4 (HER4). A germline *ERBB2* mutation was identified in  
114 another family with autosomal dominant NSCLC, without additional *HER2* somatic  
115 variant(s) [24]. No paediatric NSCLC were reported in these families; indeed, primary lung

116 cancers in children are very rare [25, 26]. Notably, none of the loci associated with lung  
117 cancer in the many GWAS to date have included *EGFR* or other ERBB family members [4].

118

119 Here, we report a new causative gene in a family with autosomal dominant NSCLC.

120

## 121 **MATERIALS AND METHODS**

122 This study was approved by The Prince Charles Hospital Metro North Human  
123 Research Ethics Committee (approval HREC/13/QPCH/216). Participants gave informed  
124 written consent.

125

126 Detailed methods are presented in Supplementary Data. Briefly, exome sequencing  
127 was performed on germline DNA in a multi-generational family with autosomal dominant  
128 NSCLC (Fig. 1). Given the rarity of autosomal dominant NSCLC, and paediatric lung  
129 malignancies overall [25, 26], analysis focussed on rare variants (previously unreported; and  
130 with minor allele frequency [MAF] <0.001), assessed against internal and external databases  
131 (e.g. gnomAD [27], 1000 Genomes [28], and dbSNP137 [29]).

132

133 Formalin-fixed paraffin-embedded [FFPE] samples were obtained from individuals  
134 LGCA-1.2, LGCA-1.3 and LGCA-1.6, with DNA extracted and sequenced. Expression and  
135 localisation of ErbB3 in normal and tumour tissue was assessed by immunohistochemistry.

136

137 Full-length wild-type (wtErbB3) and mutant (mutErbB3, c.1946T>G: p.Iso649Arg)  
138 *ERBB3* expression constructs were produced and transfected into HeLa cells (which do not  
139 express endogenous ErbB3 or ErbB2, but do express EGFR (ErbB1), the preferred  
140 dimerisation partner of ErbB3 [30]). To evaluate protein size and conformation, Western

141 blotting was performed on lysates from transfected HeLa cells (vector-only, wtErbB3, or  
142 mutErbB3), probed with commercial anti-bodies against ErbB3 with  $\beta$ -tubulin used as  
143 protein-loading control. To assess localisation pre- and post-stimulation, transfected cells  
144 were either fixed (0') or stimulated with 10ng EGF-Alexa Fluor 488 (30') prior to fixation,  
145 and immunostained for ErbB3 and endogenous EGFR, with nuclei stained using DAPI.  
146 Transfected cells (vector-only, wtErbB3 or mutErbB3, co-transfected with green fluorescence  
147 protein) were separated by fluorescence-activated cell sorting and proliferation rate assessed.  
148 Signalling pathway activation of ErbB3 and mutErbB3 transfected cells were analysed by  
149 immunoblotting for ErbB3, EGFR, Akt (phospho- and total) and ERK (phospho- and total) in  
150 cells grown in full serum (control), 3 hours post-serum starvation (0) and post-EGF  
151 stimulation (10ng/ml) at 10 minutes and 30 minutes. Relative protein expression was  
152 quantified and the ratio normalised to  $\beta$ -Tubulin (used as a loading control) to enable the  
153 quantification of phospho- to total-Akt (pAkt/tAkt) and phospho- to total-ERK  
154 (pERK/tERK). Results are presented without formal statistical assessment, as is conventional  
155 for these analyses [31].

156

## 157 **RESULTS**

### 158 *Clinical details*

159 The proband (LGCA-1.2) presented with lung adenocarcinoma aged 51 years. Her  
160 father and paternal grandfather, died of NSCLC aged 39 and 34 years, respectively. Two of  
161 her five children have lung adenocarcinoma, presenting aged 12 and 30 years (Fig. 1). The  
162 proband, her father and grandfather had all smoked at some stage; however, neither of the  
163 children had ever smoked.

164

### 165 *Exome sequencing*



166 Four novel good-quality variants affecting highly conserved bases and with  
167 appropriate familial segregation were identified, three of which were predicted damaging by  
168 at least two protein prediction algorithms (Table 1; Filtering steps presented in  
169 Supplementary Data: Table S1). Of these, the *ERBB3* variant (NM\_001982; c.1946T>G;  
170 p.Ile649Arg) was of particular interest given the known oncogenic role of ErbB3 itself [32],  
171 and of other ErbB family members in heritable NSCLC. In considering the other two variants:  
172 *SORBS1* (*Sorbin and SH3 Domain Containing 1*) is involved in cell adhesion, growth factor  
173 signalling and cytoskeleton formation; but appears mainly to regulate insulin-mediated  
174 glucose uptake [33]. *ATG2B* (*Autophagy-Related Protein 2 Homolog B*) is involved in  
175 autophagy, a key pathway mediating stress-induced adaptation and cellular damage control.  
176 However, although exploited by cancer cells to survive stressors (e.g., starvation, hypoxia,  
177 and chemotherapy), autophagy is not considered an oncogenic driver process *per se* [34].

178 Filtering the data with a less stringent MAF threshold (MAF<0.001) identified  
179 variants in eight additional candidate genes (Supplementary Data: Table S2), of which one  
180 (*PAXIP1*) is a genome stability gene previously associated with cancer [35]. Somatic copy  
181 number variation (CNV) of *PAXIP1* has also been associated with breast cancer prognosis  
182 [36]. However, the identified variant (rs199937188) is predicted benign and tolerated by  
183 Polyphen [37] and SIFT [38].

184

185 The data were also interrogated for coding variants in genes previously implicated in  
186 familial lung cancer (specifically, *EGFR*, *ERBB2*, *TP53* or *PARK2*); none were detected.

187

188 *Tumour sequencing*

189 Sanger sequencing of tumour DNA excluded homozygosity of the *ERBB3* variant (data not  
190 shown). Unfortunately, tumour DNA from FFPE samples was too degraded for massively  
191 parallel sequencing, precluding comprehensive assessment of *ERBB3* somatic variants.

192

### 193 *Immunohistochemistry for ERBB3*

194 ErbB3 is typically upregulated in NSCLC, staining both membrane and cytoplasm  
195 [39]. Tumour tissue from the proband (LGCA-1.2) showed weak cytoplasmic ErbB3, with  
196 absent staining of normal surrounding lung tissue (Supplementary Data: Figure S1) Results  
197 from other tumour samples were inconsistent; notably, less tissue was made available from  
198 these other individuals for this study, as their tumour samples were required to inform their  
199 ongoing clinical care.

200

### 201 *ErbB3 expression, folding, and cytoplasmic localisation*

202 Both wtErbB3 and mutErbB3 were folded and expressed stably (Fig. 2A) with similar  
203 sub-cellular localisation (Fig. 2B). Cytoplasmic organelle distribution mirrored that of  
204 endogenous ErbB3 (in other, non-HeLa cells; data not shown). Compared with wtErbB3,  
205 cells expressing mutErbB3 showed a higher ratio of the 80kDa to full-length (~180kDa)  
206 forms (Fig. 2A). Without EGF stimulation, EGFR co-localised with mutErbB3 in  
207 concentrated puncta in the endosomal system, which was less evident with wtErbB3 (Fig.  
208 2B). After EGF stimulation, both wtErbB3 and mutErbB3 increased in the perinuclear region  
209 (Fig. 2B), also co-localising with EGFR at this time-point (Fig. 2B, 30' time-point).

210

### 211 *Cell proliferation*

212 HeLa cells expressing mutErbB3 demonstrated increased cellular proliferation, when  
213 compared to either HeLa cells expressing wtErbB3 or vector-only (Fig. 2C).

214

### 215 *Signalling Pathway Activation*

216 After EGF stimulation, expression levels of mutErbB3 and wtErbB3 were comparable  
217 at all time-points; though, EGFR levels decreased over time in cells expressing mutErbB3  
218 compared with wtErbB3 (Fig. 3A).

219

220 Cells expressing either mutErbB3 or wtErbB3 had increased pAkt levels, compared  
221 with vector-only transfected cells (Fig. 3B). After starvation followed by 10 minutes' EGF  
222 stimulation, similar pAkt/tAkt ratios were observed in mutErbB3, wtErbB3, and vector-only  
223 transfected cells (Fig. 3B). However, by 30 minutes, mutErbB3-transfected cells had  
224 decreased pAkt/tAkt ratios compared with both wtErbB3 and vector-only transfected cells  
225 (Fig. 3B). Of note, mutErbB3-expressing cells had increased pERK at the 30-minute time-  
226 point (Fig. 3B). These findings show that mutErbB3 is changing the signalling activation  
227 profile in response to ligand stimulation.

228 Together, these results suggest that the EGFR/mutErbB3 heterodimer is more  
229 efficiently activated, internalised and degraded, compared with EGFR/wtErbB3.

230

## 231 **DISCUSSION**

232 We have identified a novel germline mutation in *ERBB3* segregating with autosomal  
233 dominant NSCLC. We demonstrate that mutErbB3 is stably expressed, functional with EGFR  
234 heterodimerisation and signalling, with an increased ratio of 80kDa vs. full-length 180kDa  
235 ErbB, a faster time-course of signalling activation and degradation, and increased cellular  
236 proliferation, compared to wtErbB3. These results support this mutation as the oncogenic  
237 driver of NSCLC in this family.

238

239 Multiple studies demonstrate the importance of ErbB3 in oncogenesis generally and  
240 NSCLC specifically [40]. *ERBB3* is part of a five-gene expression “signature” predictive of  
241 relapse-free and overall survival in NSCLC, independent of age, gender, stage and  
242 histological characteristics [41]. In a gene expression of ten “signature” genes in early lung  
243 adenocarcinoma, a two-gene signature comprising only *ERBB3* and *BRCA1* expression was  
244 an independent risk factor in predicting survival, improving the discriminatory power of  
245 conventional classification systems [42]. Other studies also identified increased ErbB3  
246 expression correlating with shorter survival in NSCLC [43]. Within NSCLC, *ERBB3*  
247 expression is higher in adenocarcinoma compared with squamous [44] and other forms of  
248 lung cancer [45]; and circulating *ERBB3* mRNA levels correlate with higher TNM stage and  
249 poorer survival in adenocarcinoma [46].

250

251 The mutation reported here (c.1946T>G; p.Ile649Arg) lies in a conserved  
252 transmembrane motif, key to dimerization [47]. Notably the ERBB2 variant (p.Gly660Asp)  
253 previously associated with autosomal dominant NSCLC is located in the corresponding  
254 transmembrane motif of HER2 [24]. Although germline *ERBB3* variants have been reported  
255 previously [48], pathogenic variants have been reported extremely rarely – viz., a germline  
256 *ERBB3* mutation (c.4009G>A;p.Ala1337Thr), affecting the C-terminus of the protein, was  
257 reported in association with familial erythroleukemia [49]; and a homozygous loss-of-  
258 function mutation in *ERBB3* was associated with Lethal Congenital Contractural Syndrome  
259 Type 2 (OMIM 607598) in two Israeli-Bedouin families [50].

260

261 Although it has been hypothesised that germline polymorphisms in ErbB genes would  
262 contribute to lung cancer risk [51], no such associations have been identified in GWAS of  
263 lung cancer to date (neither lung cancer overall nor individual histopathological subtype) [4-

264 8, 14]. Indeed, *ERBB3* has been ‘relatively under-investigated’ in lung cancer [51]. A very  
265 small single-candidate gene study suggested association of a variant in the *ERBB3* promoter  
266 region with lung cancer – but only with analysis restricted to a recessive model and limited to  
267 a non-smoking subset of 119 cases and 191 controls ( $P=0.037$ ) [52]. Reduced *ERBB3*  
268 expression was reported with the protective allele, consistent with an oncogenic role of  
269 *ERBB3*; however, these results have not been replicated in an independent cohort. Somatic  
270 *ERBB3* mutations, whilst common in colonic and gastric carcinomas, appear to be rare in  
271 NSCLC (Supplementary Data: Table S3). However, a study assessing CNVs in ErbB genes  
272 found that half of all lung adenocarcinomas have CNVs of *EGFR*, *ERBB2*, *ERBB3* and  
273 *ERBB4*, with higher CNV number corresponding to poorer prognosis [53].

274

275 Our germline *ERBB3* mutation is novel for NSCLC; and has not been reported (either  
276 as a somatic or germline mutation) in any other tumour type. Attributing causality to a variant  
277 segregating within a relatively small family just because of its rarity can lead to  
278 misattribution [54, 55]; hence our comprehensive functional assessment supporting this  
279 mutation as causative. Unsurprisingly, given the rarity of autosomal dominant NSCLC, no  
280 additional families were available for replication. However, our data concord with previous  
281 reports of germline mutations in ErbB family members *EGFR* (*ERBB1*) [56] and *ERBB2* [24]  
282 in other pedigrees with autosomal dominant NSCLC. Poor quality tumour DNA precluded  
283 assessment of *ERBB3* mutation(s) in our family, noting that somatic mutations were not  
284 identified in the single family with the germline *ERBB2* mutation and NSCLC [24], and  
285 inconsistently in individuals and families with *EGFR/ERBB1* mutations [56]. Although  
286 ErbB3 is expressed widely, this family has not manifested other malignancies (the proband  
287 has had non-cancerous colonic polyps). The apparent tissue specificity for malignancy is

288 unclear, although again is consistent with NSCLC families with *EGFR* (ERBB1) [56] and  
289 *ERBB2* [24] mutations.

290

291 Our functional data support the identified variant as tumorigenic. Normally, ErbB3  
292 (180kDa) is expressed as a transmembrane protein dimerised with another ErbB family  
293 member; upon activation, the heterodimer is internalised via ligand-induced receptor  
294 mediated endocytosis to endosomes and subsequently trafficked to lysosomes for  
295 proteolytical degradation. Additionally, some transmembrane ErbB3 is directly cleaved,  
296 forming a cytoplasmic stable and active 80kDa form, which effects are normally offset by the  
297 tumour suppressor p14ARF sequestering the 80kDa form for degradation [57]. Our results  
298 suggest that mutErbB3 is more prone to cleavage, resulting in increased amounts of the  
299 cytoplasmic 80kDa form; moreover, this increase in the 80kDa form may exceed the  
300 sequestration capacity of p14ARF. Further, the 80kDa form may independently drive  
301 proliferation, as it can increase transcription of proliferative genes without requiring  
302 activation of cytoplasmic pathways [57]. Notably, our results demonstrated increased cellular  
303 proliferation in mutErbB3-transfected cells compared to wtErbB3.

304

305 We also demonstrated that mutErbB3 co-localised with EGFR; with EGFR levels  
306 decreasing over time in mutErbB3-transfected cells, compared to wtErbB3-transfected cells.  
307 Together, these results suggest that EGFR/mutErbB3 dimers internalise and reach the late  
308 endosomal/lysosomal system faster than wtErbB3-transfected cells, consistent with more  
309 rapid signal transduction with mutErbB3. Further, activation profiles of downstream  
310 signalling pathways differed in mutErbB3-transfected cells compared to wtErbB3-transfected  
311 cells; these pathways affect transcriptional regulation of cell proliferation and migration, both  
312 critical for cancer initiation and metastasis [32].

313

314           Our results may have clinical implications beyond genetic counselling. Both germline  
315 and somatic EGFR mutations affect NSCLC responsiveness to TKIs; and HER family-  
316 targeted therapy can induce prolonged progression-free survival specifically in individuals  
317 with TK domain mutations (including NSCLC) [58]. The identified *ERBB3* mutation does  
318 not lie within this domain; thus, HER family inhibitors may not benefit this family. However,  
319 ErbB3 downregulation (e.g. by siRNA) can restore tumour responsiveness to various  
320 therapeutic approaches, including TKIs, potentially of clinical relevance for this family [58].

321

322 **In conclusion**, we report the first family with heritable NSCLC segregating with a germline  
323 mutation in *ERBB3*, with functional data strongly supporting this mutation as oncogenic.

324

### 325 **Funding**

326           This work was supported by the Cancer Council Queensland (#1041390), the  
327 Queensland Head and Neck Cancer Centre, the Princess Alexandra Research Foundation  
328 (#2016030) [FS] and a Queensland University of Technology Cancer Programme Publication  
329 Award. AML is funded by a National Health and Medical Research Council (NHMRC) Early  
330 Career Fellowship (ID 1158111). SRJ is supported by Princess Alexandra Research  
331 Foundation. AML is supported by an NHMRC ECF (#1158111). MAB was supported by a  
332 NHMRC Senior Principal Research Fellowship (ID 1024879). The Translational Research  
333 Institute was supported by a grant from the Australian Government.

334

### 335 **Acknowledgements**

336           We thank the family for their gracious participation. Additionally, we thank  
337 pathologist David Godbolt; research nurses Deborah Courtney, Linda Passmore, Elisabeth

338 McCaul; Sharon Song for technical support; David Pennisi and Karolina Slater for writing  
339 and administrative support; and Malcolm Lim. The authors acknowledge the Translational  
340 Research Institute for providing the excellent research environment and microscopy and  
341 histology core facilities.

342

343 **Author Contributions:**

344 KF, RB, IY, JS, AML, ELD and MAB established the study. KF, PI, MG and TH  
345 identified and recruited family members to the study. ELD, AML, MB, JH, LA, PL, FS, SO,  
346 SRJ, CC and HYC designed and optimized experimental approach, performed the  
347 experiments and analyzed the data. ELD, AML and FS wrote the first draft of the manuscript,  
348 with additional input from, LW, HYC, SRJ and SO. All authors critically reviewed the final  
349 manuscript.

350

351 **Web resources**

352 COSMIC: <https://cancer.sanger.ac.uk/cosmic>

353 World Health Organisation statistics: [http://globocan.iarc.fr/Pages/fact\\_sheets\\_cancer.aspx](http://globocan.iarc.fr/Pages/fact_sheets_cancer.aspx)

354

355 **Supplementary Data**



356 **References**

- 357 1. World Health Organisation. *Cancer Fact Sheet*. [https://www.who.int/news-room/fact-](https://www.who.int/news-room/fact-sheets/detail/cancer)  
358 [sheets/detail/cancer](https://www.who.int/news-room/fact-sheets/detail/cancer).
- 359 2. Mucci LA, Hjelmborg JB, Harris JR, *et al*. Familial Risk and Heritability of Cancer  
360 Among Twins in Nordic Countries. *JAMA* 2016;315(1):68-76.
- 361 3. Bosse Y, Amos CI. A Decade of GWAS Results in Lung Cancer. *Cancer Epidemiol*  
362 *Biomarkers Prev* 2018;27(4):363-379.
- 363 4. EMBL-EBI. Lung Cancer GWAS loci. In; 2020.
- 364 5. EMBL-EBI. NSCLC GWAS Database. In; 2020.
- 365 6. McKay JD, Hung RJ, Han Y, *et al*. Large-scale association analysis identifies new  
366 lung cancer susceptibility loci and heterogeneity in genetic susceptibility across histological  
367 subtypes. *Nat Genet* 2017;49(7):1126-1132.
- 368 7. EMBL-EBI. Squamous Cell Carcinoma of the lung GWAS database. In; 2020.
- 369 8. EMBL-EBI. Adenocarcinoma of the lung GWAS database. In; 2020.
- 370 9. Sellers TA, Bailey-Wilson JE, Elston RC, *et al*. Evidence for mendelian inheritance in  
371 the pathogenesis of lung cancer. *J Natl Cancer Inst* 1990;82(15):1272-9.
- 372 10. Schwartz AG, Yang P, Swanson GM. Familial risk of lung cancer among nonsmokers  
373 and their relatives. *Am J Epidemiol* 1996;144(6):554-62.
- 374 11. Wu PF, Lee CH, Wang MJ, *et al*. Cancer aggregation and complex segregation  
375 analysis of families with female non-smoking lung cancer probands in Taiwan. *Eur J Cancer*  
376 2004;40(2):260-6.
- 377 12. Wu AH, Fontham ET, Reynolds P, *et al*. Family history of cancer and risk of lung  
378 cancer among lifetime nonsmoking women in the United States. *Am J Epidemiol*  
379 1996;143(6):535-42.

- 380 13. Lorenzo Bermejo J, Hemminki K. Familial lung cancer and aggregation of smoking  
381 habits: a simulation of the effect of shared environmental factors on the familial risk of  
382 cancer. *Cancer Epidemiol Biomarkers Prev* 2005;14(7):1738-40.
- 383 14. Byun J, Schwartz AG, Lusk C, *et al.* Genome-wide association study of familial lung  
384 cancer. *Carcinogenesis* 2018;39(9):1135-1140.
- 385 15. Fang S, Pinney SM, Bailey-Wilson JE, *et al.* Ordered subset analysis identifies loci  
386 influencing lung cancer risk on chromosomes 6q and 12q. *Cancer Epidemiol Biomarkers*  
387 *Prev* 2010;19(12):3157-66.
- 388 16. Musolf AM, Simpson CL, de Andrade M, *et al.* Parametric Linkage Analysis  
389 Identifies Five Novel Genome-Wide Significant Loci for Familial Lung Cancer. *Hum Hered*  
390 2016;82(1-2):64-74.
- 391 17. Poirier JG, Brennan P, McKay JD, *et al.* Informed genome-wide association analysis  
392 with family history as a secondary phenotype identifies novel loci of lung cancer. *Genet*  
393 *Epidemiol* 2015;39(3):197-206.
- 394 18. Xiong D, Wang Y, Kupert E, *et al.* A recurrent mutation in PARK2 is associated with  
395 familial lung cancer. *Am J Hum Genet* 2015;96(2):301-8.
- 396 19. Seow WJ, Matsuo K, Hsiung CA, *et al.* Association between GWAS-identified lung  
397 adenocarcinoma susceptibility loci and EGFR mutations in never-smoking Asian women, and  
398 comparison with findings from Western populations. *Hum Mol Genet* 2017;26(2):454-465.
- 399 20. Cheng YI, Gan YC, Liu D, *et al.* Potential genetic modifiers for somatic EGFR  
400 mutation in lung cancer: a meta-analysis and literature review. *BMC Cancer*  
401 2019;19(1):1068.
- 402 21. Zhou C, Yao LD. Strategies to Improve Outcomes of Patients with EGRF-Mutant  
403 Non-Small Cell Lung Cancer: Review of the Literature. *J Thorac Oncol* 2016;11(2):174-86.

- 404 22. Kobayashi S, Boggon TJ, Dayaram T, *et al.* EGFR mutation and resistance of non-  
405 small-cell lung cancer to gefitinib. *N Engl J Med* 2005;352(8):786-92.
- 406 23. Gazdar A, Robinson L, Oliver D, *et al.* Hereditary lung cancer syndrome targets never  
407 smokers with germline EGFR gene T790M mutations. *J Thorac Oncol* 2014;9(4):456-63.
- 408 24. Yamamoto H, Higasa K, Sakaguchi M, *et al.* Novel germline mutation in the  
409 transmembrane domain of HER2 in familial lung adenocarcinomas. *J Natl Cancer Inst*  
410 2014;106(1):djt338.
- 411 25. Cohen MC, Kaschula RO. Primary pulmonary tumors in childhood: a review of 31  
412 years' experience and the literature. *Pediatr Pulmonol* 1992;14(4):222-32.
- 413 26. Giuseppucci C, Reusmann A, Giubergia V, *et al.* Primary lung tumors in children: 24  
414 years of experience at a referral center. *Pediatr Surg Int* 2016;32(5):451-7.
- 415 27. Karczewski KJ, Francioli L, tiao G, *et al.* Variation across 141,456 human exomes  
416 and genomes reveals the spectrum of loss-of-function intolerance across human protein-  
417 coding genes. *bioRxiv* 531210, 2019; <https://doi.org/10.1101/531210>  
418 <https://www.biorxiv.org/content/10.1101/531210v3>.
- 419 28. Genomes Project C, Auton A, Brooks LD, *et al.* A global reference for human genetic  
420 variation. *Nature* 2015;526(7571):68-74.
- 421 29. Sherry ST, Ward MH, Kholodov M, *et al.* dbSNP: the NCBI database of genetic  
422 variation. *Nucleic Acids Res* 2001;29(1):308-11.
- 423 30. Guy PM, Platko JV, Cantley LC, *et al.* Insect cell-expressed p180erbB3 possesses an  
424 impaired tyrosine kinase activity. *Proc Natl Acad Sci U S A* 1994;91(17):8132-6.
- 425 31. Pillai-Kastoori L, Schutz-Geschwender AR, Harford JA. A systematic approach to  
426 quantitative Western blot analysis. *Anal Biochem* 2020;593:113608.
- 427 32. Jaiswal BS, Kljavin NM, Stawiski EW, *et al.* Oncogenic ERBB3 mutations in human  
428 cancers. *Cancer Cell* 2013;23(5):603-17.

- 429 33. Lesniewski LA, Hosch SE, Neels JG, *et al.* Bone marrow-specific Cap gene deletion  
430 protects against high-fat diet-induced insulin resistance. *Nat Med* 2007;13(4):455-62.
- 431 34. Amaravadi R, Kimmelman AC, White E. Recent insights into the function of  
432 autophagy in cancer. *Genes Dev* 2016;30(17):1913-30.
- 433 35. Mailand N, Gibbs-Seymour I, Bekker-Jensen S. Regulation of PCNA-protein  
434 interactions for genome stability. *Nat Rev Mol Cell Biol* 2013;14(5):269-82.
- 435 36. De Gregoriis G, Ramos JA, Fernandes PV, *et al.* DNA repair genes PAXIP1 and  
436 TP53BP1 expression is associated with breast cancer prognosis. *Cancer Biol Ther*  
437 2017;18(6):439-449.
- 438 37. Adzhubei IA, Schmidt S, Peshkin L, *et al.* A method and server for predicting  
439 damaging missense mutations. *Nat Methods* 2010;7(4):248-9.
- 440 38. Vaser R, Adusumalli S, Leng SN, *et al.* SIFT missense predictions for genomes. *Nat*  
441 *Protoc* 2016;11(1):1-9.
- 442 39. Scharpenseel H, Hanssen A, Loges S, *et al.* EGFR and HER3 expression in  
443 circulating tumor cells and tumor tissue from non-small cell lung cancer patients. *Sci Rep*  
444 2019;9(1):7406.
- 445 40. Ma S, Jia S, Ren Y, *et al.* ErbB3 Ligand Heregulin1 Is a Major Mitogenic Factor for  
446 Uncontrolled Lung Cancer Cell Proliferation. *Neoplasia* 2019;21(4):343-352.
- 447 41. Chen HY, Yu SL, Chen CH, *et al.* A five-gene signature and clinical outcome in non-  
448 small-cell lung cancer. *N Engl J Med* 2007;356(1):11-20.
- 449 42. Sun Y, Hou L, Yang Y, *et al.* Two-gene signature improves the discriminatory power  
450 of IASLC/ATS/ERS classification to predict the survival of patients with early-stage lung  
451 adenocarcinoma. *Onco Targets Ther* 2016;9:4583-91.

- 452 43. Yi ES, Harclerode D, Gondo M, *et al.* High c-erbB-3 protein expression is associated  
453 with shorter survival in advanced non-small cell lung carcinomas. *Mod Pathol*  
454 1997;10(2):142-8.
- 455 44. Skrzypski M, Dziadziuszko R, Jassem E, *et al.* Main histologic types of non-small-  
456 cell lung cancer differ in expression of prognosis-related genes. *Clin Lung Cancer*  
457 2013;14(6):666-673 e2.
- 458 45. Kawano O, Sasaki H, Endo K, *et al.* ErbB3 mRNA expression correlated with  
459 specific clinicopathologic features of Japanese lung cancers. *J Surg Res* 2008;146(1):43-8.
- 460 46. Masroor M, Javid J, Mir R, *et al.* Prognostic significance of serum ERBB3 and  
461 ERBB4 mRNA in lung adenocarcinoma patients. *Tumour Biol* 2016;37(1):857-63.
- 462 47. Mendrola JM, Berger MB, King MC, *et al.* The single transmembrane domains of  
463 ErbB receptors self-associate in cell membranes. *J Biol Chem* 2002;277(7):4704-12.
- 464 48. Karczewski KJ, Francioli LC, Tiao G, *et al.* The mutational constraint spectrum  
465 quantified from variation in 141,456 humans. *Nature* 2020;581(7809):434-443.
- 466 49. Braunstein EM, Li R, Sobreira N, *et al.* A germline ERBB3 variant is a candidate for  
467 predisposition to erythroid MDS/erythroleukemia. *Leukemia* 2016;30(11):2242-2245.
- 468 50. Narkis G, Ofir R, Manor E, *et al.* Lethal congenital contractural syndrome type 2  
469 (LCCS2) is caused by a mutation in ERBB3 (Her3), a modulator of the phosphatidylinositol-  
470 3-kinase/Akt pathway. *Am J Hum Genet* 2007;81(3):589-95.
- 471 51. Alaoui-Jamali MA, Morand GB, da Silva SD. ErbB polymorphisms: insights and  
472 implications for response to targeted cancer therapeutics. *Front Genet* 2015;6:17.
- 473 52. Sung JS, Jin L, Jo U, *et al.* Association between -276 C/T polymorphism of the  
474 ERBB3 gene and lung cancer risk in a Korean population. *Anticancer Res* 2012;32(10):4433-  
475 7.

- 476 53. Chen HY, Liu CH, Chang YH, *et al.* EGFR-activating mutations, DNA copy number  
477 abundance of ErbB family, and prognosis in lung adenocarcinoma. *Oncotarget*  
478 2016;7(8):9017-25.
- 479 54. MacArthur DG, Manolio TA, Dimmock DP, *et al.* Guidelines for investigating  
480 causality of sequence variants in human disease. *Nature* 2014;508(7497):469-76.
- 481 55. Minikel EV, Vallabh SM, Lek M, *et al.* Quantifying prion disease penetrance using  
482 large population control cohorts. *Sci Transl Med* 2016;8(322):322ra9.
- 483 56. Yamamoto H, Yatabe Y, Toyooka S. Inherited lung cancer syndromes targeting never  
484 smokers. *Transl Lung Cancer Res* 2018;7(4):498-504.
- 485 57. Andrique L, Fauvin D, El Maassarani M, *et al.* ErbB3(80 kDa), a nuclear variant of  
486 the ErbB3 receptor, binds to the Cyclin D1 promoter to activate cell proliferation but is  
487 negatively controlled by p14ARF. *Cell Signal* 2012;24(5):1074-85.
- 488 58. Verlingue L, Hollebecque A, Lacroix L, *et al.* Human epidermal receptor family  
489 inhibitors in patients with ERBB3 mutated cancers: Entering the back door. *Eur J Cancer*  
490 2018;92:1-10.
- 491

492 **Table 1. Characteristics of Variants Fulfilling Filtering Criteria**

| <b>Gene</b>                                                | <b>Variant</b>                             | <b>GERP score</b> | <b>SIFT</b>            | <b>MutationTaster</b>   | <b>PolyPhen2</b>          |
|------------------------------------------------------------|--------------------------------------------|-------------------|------------------------|-------------------------|---------------------------|
| <i>ERBB3 (Erb-B2 Receptor Tyrosine Kinase 3)</i>           | NM_001982:<br>c.1946T>G:<br>p.Ile649Arg    | 3.87              | 0.00<br>(deleterious)  | 0.995 (disease-causing) | 0.121 (benign)            |
| <i>ATG2B (Autophagy related 2B)</i>                        | NM_018036:<br>c.4057T>A:<br>p.Cys1353Ser   | 5.48              | 0.05<br>(deleterious)  | 0.999 (disease-causing) | 0.978 (probably damaging) |
| <i>SORBS1 (Sorbin and SH3 domain-containing protein 1)</i> | NM_001034954:<br>c.2464A>G:<br>p.Ile822Val | 6.07              | 0.05<br>(deleterious*) | 0.999 (deleterious)     | 0.903 (possibly damaging) |

493

494 **FIGURE LEGENDS**

495 **Figure 1.** Germline *ERBB3* mutation segregating with NSCLC in an affected family. **A.**  
496 Family Pedigree. **B.** Sanger sequencing chromatograms of germline DNA, demonstrating  
497 heterozygosity for *ERBB3* c.1946T>G variant (arrow) in three affected individuals and  
498 wildtype in the proband's unaffected mother.

499

500 **Figure 2. ErbB3 expression, folding, response to stimulation with EGF, and effect on**  
501 **cellular proliferation, in HeLa cells transfected with vector-only, wtErbB3, or**  
502 **mutErbB3.**

503 **A.** Western blot of lysates from transfected cells using two different commercial anti-ErbB3  
504 antibodies. MutErbB3 is stably expressed and normally folded. A higher ratio of 80kDa to  
505 full length 180kDa form (arrows) is observed with mutErbB3 compared to wtErbB3.

506 **B.** Transfected HeLa cells fixed pre- (0') and post (30')-EGF stimulation and immunostained  
507 for ErbB3 (red), endogenous EGFR (purple) and nuclei stained using DAPI (blue). Right  
508 column shows merged image. Scale bars, 20µm.

509 Without stimulation EGFR co-localised with mutErbB3 in concentrated puncta, less evident  
510 with wtErbB3. After stimulation, both wtErbB3 and mutErbB3 increased in the perinuclear  
511 region, co-localising with EGFR.

512 **C.** Proliferation assay of transfected cells quantified and described as fold change relative to  
513 vector only (data shown as mean ± S.E.M).

514 MutErbB3-transfected cells showed increased rates of proliferation.

515

516 **Figure 3. Analysis of protein expression and down-stream signalling pathway activation**  
517 **in HeLa cells transfected with vector-only, wtErbB3, or mutErbB3 constructs, before**



518 **starvation (control), after 3 hours starvation (0 min) followed by EGF stimulation**  
519 **(assessed at 10 min and 30 min).**

520 **A.** Western blots of ErbB3, EGFR, phospho-Akt (pAkt), total Akt (tAkt), phospho-ERK  
521 (pERK) and total ERK (tERK), performed on transfected cell lysates.

522 Following starvation and EGF stimulation, mutErbB3-transfected cells demonstrated  
523 decreased EGFR levels compared with wtErbB3.

524 **B.** Ratios of phospho-Akt to total-Akt (pAkt/tAkt) (upper graphs), and phospho-ERK to total-  
525 ERK (pERK/tERK) (lower graphs) quantified and normalised to  $\beta$ -Tubulin.

526 By 30 minutes, mutErbB3-transfected cells show decreased pAkt/tAkt ratio and increased  
527 pERK/tERK ratio compared with wtErbB3-transfected cells

528 Both blot images and ratio quantification are representative of at least three separate  
529 biological replicates.

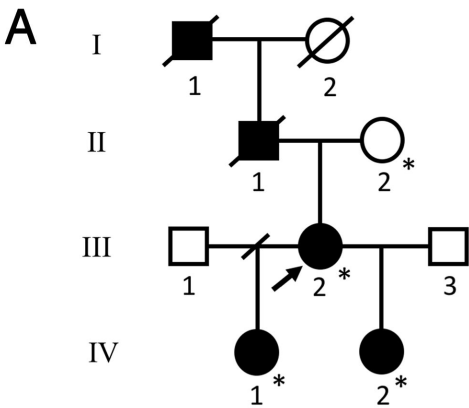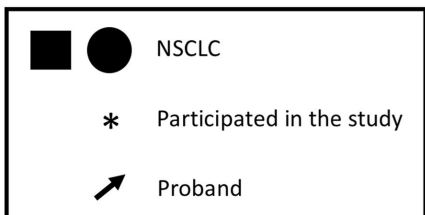

**B**

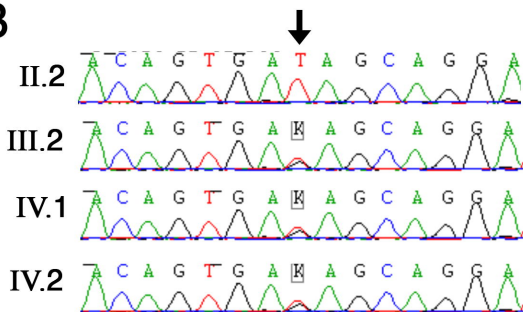

**A**

LSBio anti-ErbB3 Antibody      CST anti-ErbB3 Antibody

Vector Only  
Wild Type ErbB3  
Mutant ErbB3

Vector Only  
Wild Type ErbB3  
Mutant ErbB3

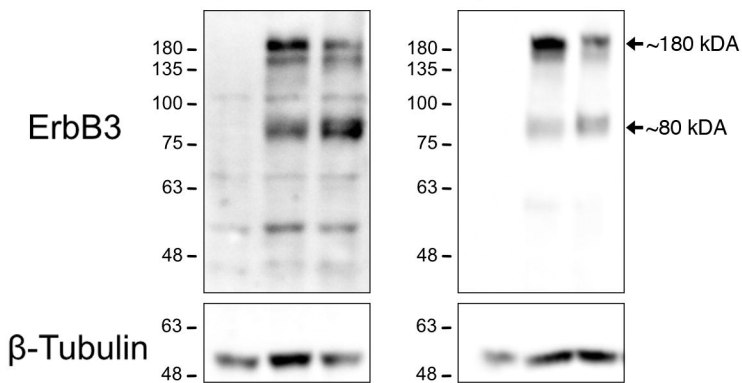**B**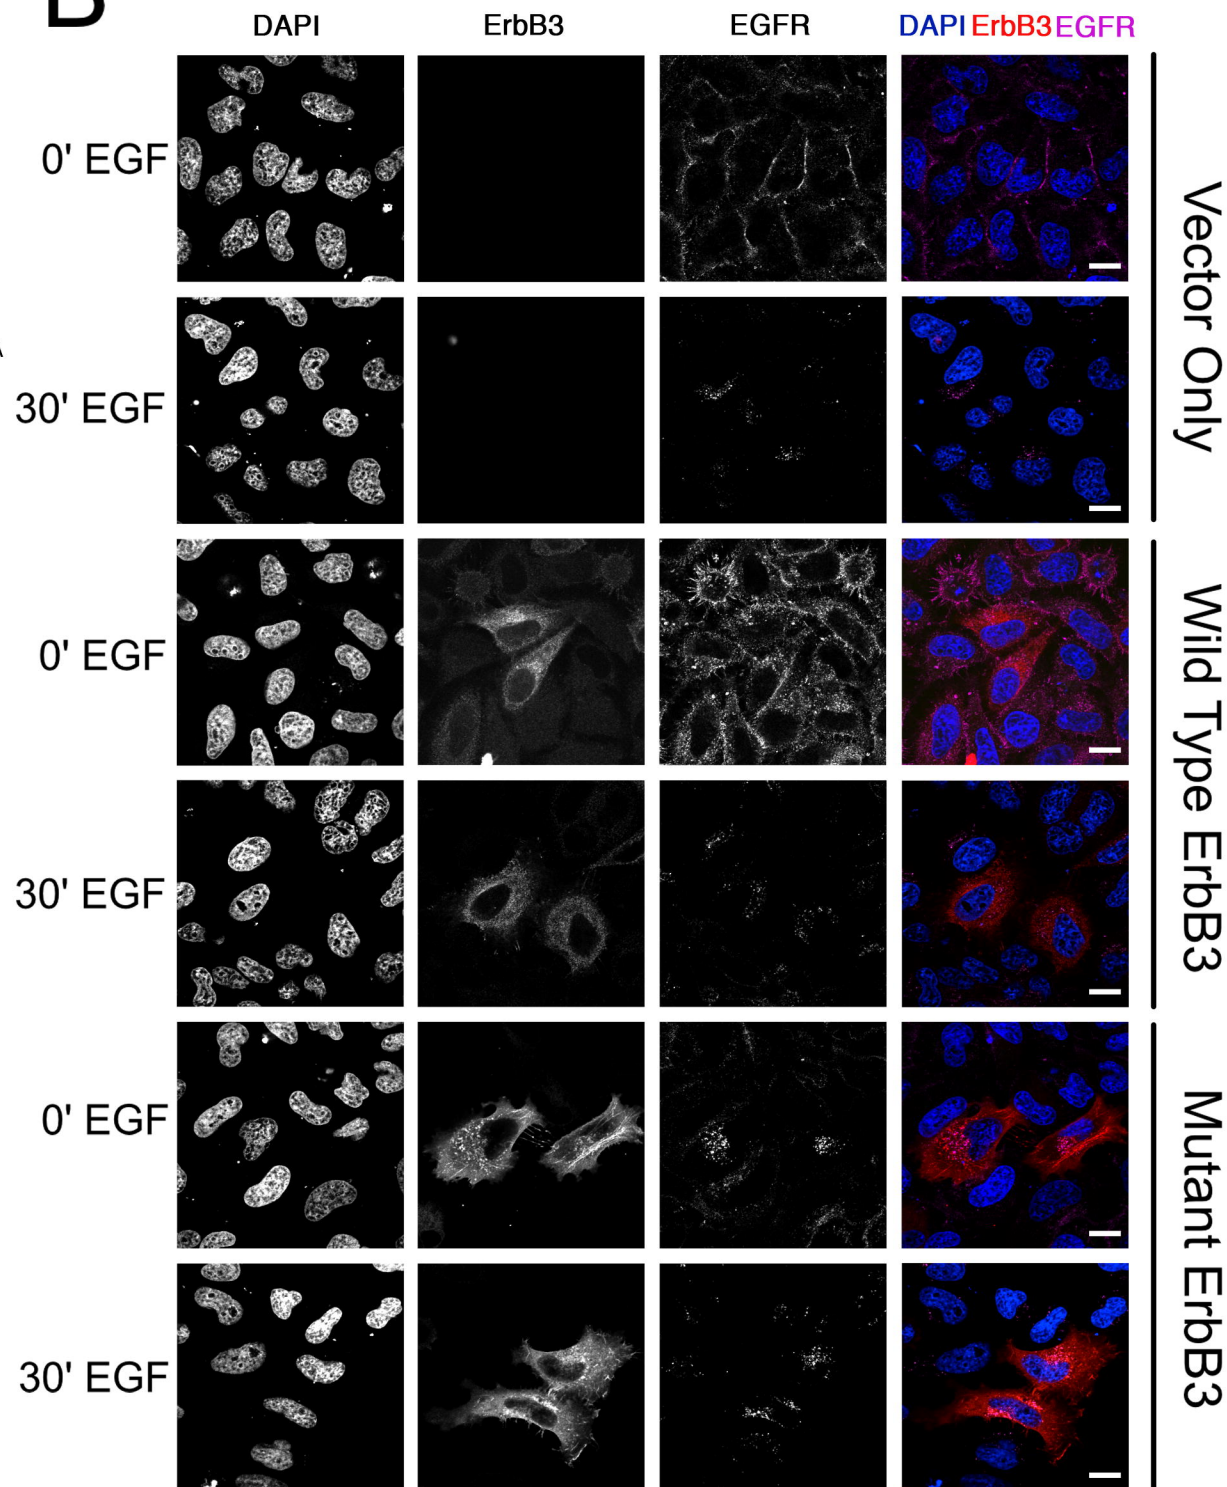**C**

Proliferation of GFP-sorted transfected cells

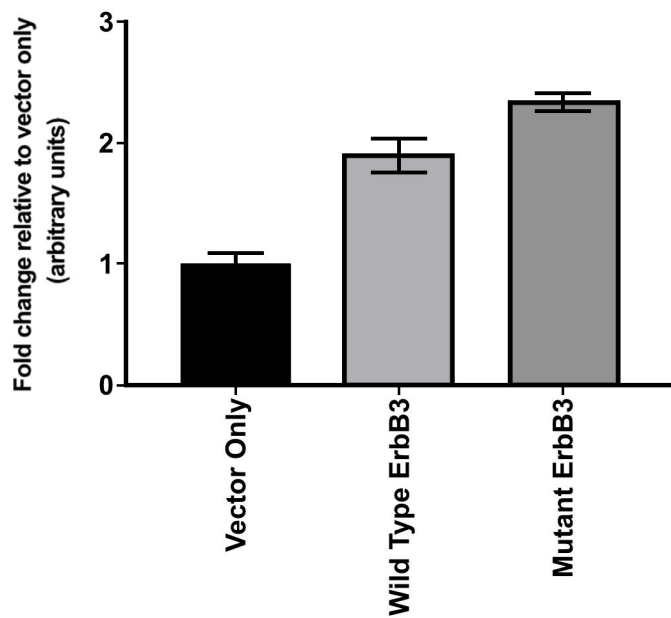

**A**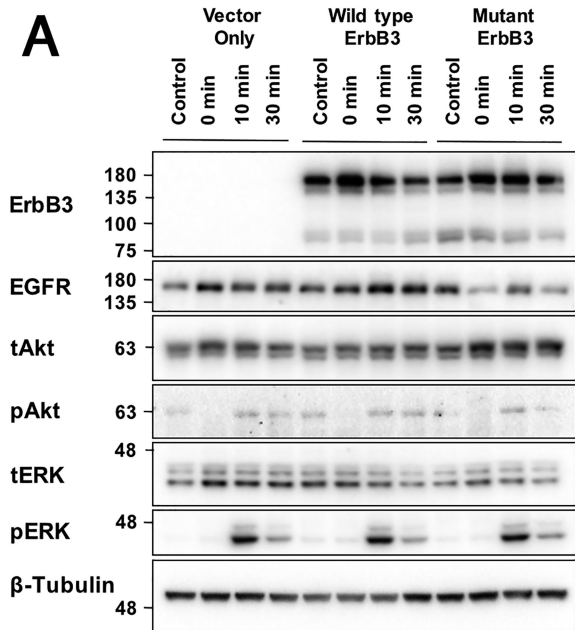**B**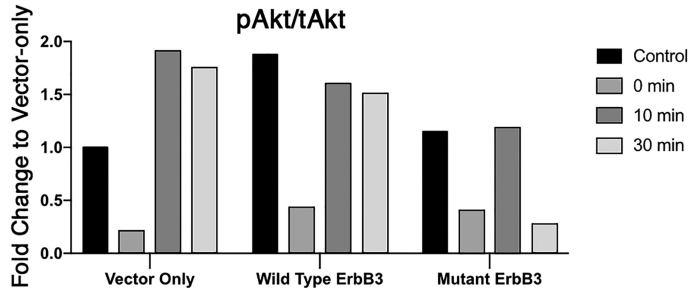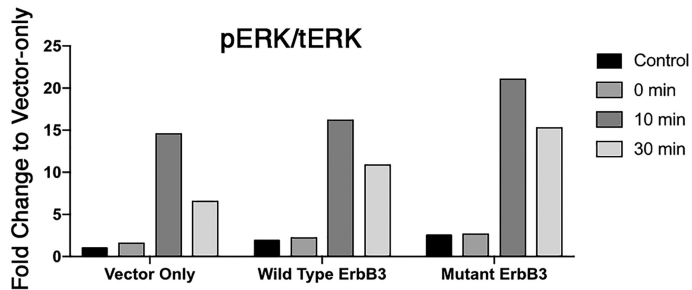

Source: https://www.biorxiv.org/content/biorxiv/early/2021/01/19/2020.05.29.122796.full.pdf
